# Supplementary material for: Peptidase inhibitor 15 as a novel blood diagnostic marker for cholangiocarcinoma
Source: PubMed Central journal article supplement — eBioMedicine. 2019 Jan 9;40:422–31. doi: 10.1016/j.ebiom.2018.12.063 (PMC6414306; doi:10.1016/j.ebiom.2018.12.063), 2019-01-09
Supplement: mmc2.pdf [file mmc2.pdf]

**Table S1 Clinical characteristics of cholangiocarcinoma patients in this study**

| Patient | Gender | Age | Diagnosis | HBsAg | HBcAb | AFP (ng/ml) | CEA (ng/ml) | CA125 (U/ml) | CA19-9 (U/ml) |
|---------|--------|-----|-----------|-------|-------|-------------|-------------|--------------|---------------|
| 1       | F      | 74  | iCCA      | N     | N     | 2.6         | 70.2        | 825.6        | 300.1         |
| 2       | F      | 71  | iCCA      | N     | N     | 0.8         | 58.8        | 137.7        | 1000          |
| 3       | F      | 48  | iCCA      | N     | P     | 1.8         | 3.3         | 30.15        | 99.57         |
| 4       | F      | 61  | iCCA      | N     | N     | 4           | 181.1       | 207.7        | 1000          |
| 5       | M      | 72  | iCCA      | N     | P     | 2.2         | 1.4         | 14.65        | 339.9         |
| 6       | F      | 58  | iCCA      | N     | P     | 4.44        | 121.6       | 1011         | 58449         |
| 7       | M      | 75  | iCCA      | N     | P     | 2.5         | 4.4         | 47.09        | 46.58         |
| 8       | M      | 60  | iCCA      | N     | P     | 2.7         | 44.8        | 77.06        | 0.6           |
| 9       | F      | 53  | iCCA      | N     | N     | 2.6         | 49.3        | 36.78        | 1000          |
| 10      | M      | 64  | iCCA      | N     | N     | 5.59        | 3.58        | 15.74        | 4142          |
| 11      | M      | 51  | iCCA      | N     | N     | 3.19        | 3.93        | 42.43        | 48.53         |
| 12      | F      | 71  | iCCA      | N     | N     | 1.6         | 48          | 869          | 6.81          |
| 13      | M      | 69  | iCCA      | N     | P     | 2.06        | 17.52       | 687.1        | 23228         |
| 14      | M      | 63  | iCCA      | N     | P     | 62.6        | 175.5       | 12.63        | 151           |
| 15      | F      | 47  | iCCA      | N     | N     | 7.1         | 6.3         | 80.77        | 126.4         |
| 16      | F      | 68  | iCCA      | N     | P     | 5.5         | 1.5         | 526.7        | 127.8         |
| 17      | M      | 59  | dCCA      | N     | P     | NA          | NA          | NA           | 31.98         |
| 18      | M      | 52  | pCCA      | N     | N     | 2.2         | 0.9         | 28           | 335.2         |
| 19      | M      | 76  | iCCA      | N     | N     | 2.65        | 4.38        | 10.71        | 656.1         |
| 20      | M      | 65  | pCCA      | N     | P     | 2.2         | 6.4         | 18.7         | 1000          |
| 21      | M      | 52  | pCCA      | N     | P     | 4.5         | 3.3         | 27.97        | 952.3         |
| 22      | M      | 73  | dCCA      | N     | P     | 5.6         | 4.7         | NA           | 72.93         |
| 23      | M      | 40  | pCCA      | N     | P     | 26.3        | 1.7         | 81.18        | 1000          |
| 24      | M      | 64  | dCCA      | N     | P     | 4.1         | 5.3         | NA           | 1000          |
| 25      | F      | 62  | dCCA      | N     | P     | 4.7         | 2.3         | 81.02        | 1000          |
| 26      | M      | 67  | iCCA      | N     | P     | 209.9       | 48          | 68.07        | 1000          |
| 27      | F      | 38  | iCCA      | N     | P     | 26.5        | 47.1        | 11.68        | 12.48         |
| 28      | F      | 66  | iCCA      | N     | P     | 3.4         | 3.5         | 10.32        | 102.1         |
| 29      | F      | 53  | iCCA      | P     | P     | 1.8         | 1.3         | 22.65        | 192.2         |
| 30      | M      | 69  | iCCA      | P     | P     | 1.4         | 2.2         | 15.56        | 20.89         |
| 31      | M      | 64  | iCCA      | P     | P     | 95.49       | 3.74        | 61.07        | 29925         |
| 32      | M      | 55  | iCCA      | P     | P     | 1.7         | 2.2         | 278.2        | 17.19         |
| 33      | F      | 49  | iCCA      | P     | P     | NA          | NA          | 22.57        | 451.6         |
| 34      | F      | 72  | dCCA      | N     | P     | 1.8         | 2.5         | 6.06         | 152.6         |
| 35      | F      | 76  | pCCA      | N     | P     | 3.9         | 3           | 14.08        | 19.18         |
| 36      | F      | 35  | iCCA      | P     | P     | 2.3         | 1.1         | 12.21        | 30.08         |
| 37      | M      | 61  | pCCA      | N     | N     | 1.04        | 14.29       | 222.89       | 387.31        |
| 38      | M      | 74  | dCCA      | N     | P     | 1.77        | 3.73        | 80.11        | 2889          |
| 39      | F      | 48  | iCCA      | P     | P     | 769.1       | 1.9         | 20.48        | 61.09         |
| 40      | M      | 79  | pCCA      | N     | P     | 1.7         | 4.6         | 12.31        | 13.56         |
| 41      | M      | 65  | iCCA      | P     | P     | 6.4         | 3.8         | 12.57        | 56.59         |
| 42      | F      | 70  | iCCA      | N     | N     | 4.7         | 2.2         | 5.06         | 26.43         |
| 43      | F      | 61  | iCCA      | N     | N     | 5.4         | 2.9         | 9.2          | 33.32         |
| 44      | M      | 65  | pCCA      | N     | P     | 2.9         | 5.2         | 11.55        | 44.78         |
| 45      | F      | 45  | iCCA      | N     | N     | 1.76        | 80.87       | 25.39        | 16108         |
| 46      | F      | 60  | iCCA      | N     | N     | 4           | 93.8        | 830.6        | 1000          |
| 47      | M      | 66  | dCCA      | N     | P     | 2.4         | 5.3         | 78.13        | 844.2         |
| 48      | M      | 55  | dCCA      | N     | N     | 4           | 12.1        | 12.82        | 16.75         |
| 49      | F      | 67  | dCCA      | P     | P     | 13.6        | 14.9        | 182.27       | 234.8         |
| 50      | M      | 80  | dCCA      | N     | P     | 5.1         | 12.9        | 65.3         | 1000          |
| 51      | M      | 80  | dCCA      | N     | P     | 2.97        | 4.24        | 15.09        | 807.5         |
| 52      | M      | 51  | pCCA      | N     | P     | 5.97        | 7.76        | 38.01        | 3394          |
| 53      | M      | 71  | pCCA      | N     | P     | 2.6         | 3.5         | 60           | 765.4         |
| 54      | F      | 52  | iCCA      | N     | N     | 20.1        | 21.9        | 244.1        | 9.47          |
| 55      | F      | 64  | pCCA      | N     | N     | 1.9         | 13.7        | 17.29        | 25.48         |
| 56      | M      | 66  | iCCA      | N     | N     | 2.8         | 10.3        | 280.2        | 312.2         |
| 57      | M      | 70  | dCCA      | N     | N     | 3.43        | 39.64       | 406.6        | 1000          |
| 58      | F      | 34  | dCCA      | N     | P     | 3.94        | 3.96        | 58.51        | 175.2         |
| 59      | M      | 76  | dCCA      | N     | N     | 2.36        | 5.28        | 9.57         | 35.14         |
| 60      | M      | 54  | pCCA      | P     | P     | 3.32        | 7.36        | 15.02        | 473.9         |
| 61      | M      | 58  | pCCA      | N     | N     | 2.21        | 4.73        | 15.38        | 59.38         |
| 62      | M      | 47  | iCCA      | P     | P     | 18.8        | 16.2        | 79.7         | 70.38         |
| 63      | M      | 58  | iCCA      | P     | P     | 12.6        | 4.9         | NA           | 26.96         |
| 64      | F      | 51  | iCCA      | N     | N     | 13.9        | 1.4         | 11.76        | 58.22         |
| 65      | M      | 65  | iCCA      | P     | P     | 8.5         | 2.3         | 8.11         | 27.12         |
| 66      | M      | 63  | iCCA      | P     | P     | 4.3         | 0.5         | 9.14         | 14.29         |
| 67      | F      | 50  | iCCA      | N     | P     | 0.7         | 2.4         | 23.58        | 22.07         |

F, female; M, male; iCCA, intrahepatic cholangiocarcinoma; pCCA, perihilar cholangiocarcinoma; dCCA, distal cholangiocarcinoma; HBsAg, Hepatitis B Surface Antigen; HBcAb, Hepatitis B Core Antibody; P, Positive; N, Negative; NA, not available.

**Table S2 Clinical characteristics of hepatocellular carcinoma patients in this study**

| Patient | Gender | Age | Diagnosis | HBsAg | HBcAb | AFP (ng/ml) | CEA (ng/ml) | CA125 (U/ml) | CA19-9 (U/ml) |
|---------|--------|-----|-----------|-------|-------|-------------|-------------|--------------|---------------|
| 1       | M      | 62  | HCC       | N     | P     | 126.6       | 2.5         | 32.51        | 40.8          |
| 2       | F      | 54  | HCC       | N     | P     | >1210       | 1.9         | 12.58        | 14.18         |
| 3       | M      | 60  | HCC       | P     | P     | 27.4        | 2.7         | 6.46         | 31.39         |
| 4       | M      | 31  | HCC       | P     | P     | >1210       | 1.2         | 26.6         | 17.42         |
| 5       | M      | 49  | HCC       | P     | P     | >1210       | 4.4         | 54.96        | 146.7         |
| 6       | M      | 59  | HCC       | N     | P     | 71.5        | 3.8         | 13.9         | 11.21         |
| 7       | M      | 62  | HCC       | P     | P     | 4.5         | 5.7         | 16.5         | 10.88         |
| 8       | M      | 63  | HCC       | P     | P     | >1210       | 3.3         | 13.66        | 19.34         |
| 9       | M      | 70  | HCC       | P     | P     | 84.91       | 3.69        | 12.44        | 67.66         |
| 10      | F      | 49  | HCC       | P     | P     | >1210       | 1.7         | 13.12        | 25.82         |
| 11      | M      | 75  | HCC       | P     | P     | 1.1         | 2.9         | 22.61        | 29.71         |
| 12      | F      | 52  | HCC       | P     | P     | 26.3        | 0.9         | 25.77        | 52.85         |
| 13      | M      | 39  | HCC       | P     | P     | 2.2         | 1.2         | 8.45         | 12.56         |
| 14      | M      | 50  | HCC       | P     | P     | 39.1        | 1.3         | 311.1        | 23.36         |
| 15      | M      | 50  | HCC       | N     | N     | 10.5        | 1.9         | 3.75         | 33.69         |
| 16      | F      | 69  | HCC       | P     | P     | 9145        | 1.07        | NA           | 27.46         |
| 17      | M      | 50  | HCC       | P     | P     | >1210       | 2.6         | 73.68        | 11.49         |
| 18      | M      | 54  | HCC       | P     | P     | 423.1       | 2.4         | 74.54        | 32.85         |
| 19      | F      | 69  | HCC       | N     | N     | 7.85        | 6.71        | NA           | 34.95         |
| 20      | F      | 78  | HCC       | N     | N     | 37.2        | 1.3         | 14.87        | 8.33          |
| 21      | M      | 63  | HCC       | P     | P     | >1210       | 8.7         | 22.08        | 1.91          |
| 22      | M      | 55  | HCC       | P     | P     | 1.3         | 5.3         | 13.16        | 24.95         |
| 23      | F      | 54  | HCC       | P     | P     | 7.7         | 2.7         | 18.71        | 25.27         |
| 24      | F      | 66  | HCC       | P     | P     | 116.1       | 2.7         | 7.23         | 9.93          |
| 25      | M      | 47  | HCC       | P     | P     | 5           | 3.4         | 6.49         | 21.09         |
| 26      | M      | 60  | HCC       | P     | P     | 8.5         | 5.1         | 12.94        | 97.4          |
| 27      | M      | 31  | HCC       | P     | P     | >1210       | 2           | 6.02         | 8.55          |
| 28      | M      | 61  | HCC       | P     | P     | >1210       | 4.5         | 9.12         | 29.5          |
| 29      | M      | 66  | HCC       | N     | P     | >1210       | 3.4         | 20.95        | 18.35         |
| 30      | M      | 52  | HCC       | P     | P     | >1210       | 4.3         | 21.86        | 12.6          |
| 31      | M      | 73  | HCC       | P     | P     | 1136        | 1.8         | 7.22         | 8.93          |
| 32      | F      | 67  | HCC       | P     | P     | 403.8       | 2.75        | 9.3          | 33.93         |
| 33      | M      | 82  | HCC       | P     | P     | 3.6         | 3.4         | 10.43        | 24.97         |
| 34      | M      | 54  | HCC       | N     | P     | 2.3         | 0.8         | 8.8          | 7.56          |
| 35      | M      | 56  | HCC       | P     | P     | 1210        | 2.7         | 19.61        | 5.43          |
| 36      | M      | 53  | HCC       | N     | P     | 6.11        | 2.22        | 7.09         | 6.21          |
| 37      | M      | 79  | HCC       | P     | P     | 249.5       | 1.22        | 9            | 7.94          |
| 38      | M      | 54  | HCC       | N     | N     | 1210        | 3           | 78.92        | 17.61         |
| 39      | M      | 77  | HCC       | P     | P     | 277.4       | 4.4         | 7.65         | 36.71         |
| 40      | M      | 66  | HCC       | P     | P     | 3           | 2.3         | 15.54        | 11.32         |
| 41      | F      | 67  | HCC       | N     | P     | 2.77        | 1.91        | 6.33         | 19.68         |
| 42      | F      | 64  | HCC       | P     | P     | 47.8        | 4           | 15.43        | 30.78         |
| 43      | M      | 46  | HCC       | P     | P     | 139.41      | 5.55        | 3.51         | 86.39         |
| 44      | M      | 48  | HCC       | P     | P     | 398.5       | 4.5         | 18.82        | 17.93         |
| 45      | M      | 51  | HCC       | P     | P     | 1210        | 0.9         | 16.96        | 5.17          |
| 46      | M      | 56  | HCC       | P     | P     | 1210        | 6           | 12.67        | 13.75         |
| 47      | M      | 50  | HCC       | P     | P     | 1188        | 4.6         | 8.04         | 59.26         |
| 48      | F      | 50  | HCC       | P     | P     | 0.97        | 1.54        | 9.07         | 25.67         |
| 49      | M      | 67  | HCC       | N     | P     | 3.6         | 2.2         | 5.33         | 9.21          |
| 50      | M      | 55  | HCC       | P     | P     | 1065        | 1.61        | 14.64        | 11.2          |
| 51      | M      | 55  | HCC       | P     | P     | 1.9         | 2.6         | 12.47        | 14.84         |
| 52      | F      | 50  | HCC       | P     | P     | 23.81       | 3.09        | 11.55        | 6.5           |
| 53      | M      | 44  | HCC       | P     | P     | 1210        | 2           | 34.23        | 18.38         |
| 54      | M      | 55  | HCC       | P     | P     | 1210        | 2.6         | 6.17         | 20.24         |
| 55      | M      | 69  | HCC       | N     | P     | 3.2         | 2.2         | 23.47        | 20.34         |
| 56      | M      | 73  | HCC       | P     | P     | 1.5         | 3.5         | 21.4         | 15.43         |
| 57      | M      | 50  | HCC       | P     | P     | 79.5        | 2.5         | 82.77        | 21.51         |
| 58      | F      | 46  | HCC       | P     | P     | 8           | 2.7         | 16.75        | 0.77          |
| 59      | M      | 66  | HCC       | P     | P     | 4.3         | 1.5         | 10.22        | 28.54         |
| 60      | M      | 67  | HCC       | P     | P     | 1210        | 3.8         | 44.65        | 51.02         |
| 61      | M      | 77  | HCC       | N     | P     | 632.9       | 2.2         | 26.17        | 9.72          |
| 62      | M      | 77  | HCC       | N     | N     | 77          | 2.8         | NA           | 6.52          |
| 63      | M      | 48  | HCC       | P     | P     | 1210        | 2.3         | 22.46        | 7.08          |
| 64      | M      | 80  | HCC       | N     | P     | 1           | 5.23        | 15.59        | 26.65         |
| 65      | M      | 55  | HCC       | P     | P     | 4.5         | 7.1         | 10.09        | 14.99         |
| 66      | M      | 58  | HCC       | P     | P     | 12.9        | 4.5         | 10.6         | 24.76         |
| 67      | M      | 51  | HCC       | P     | P     | 125.2       | 1.3         | 4.95         | 0.6           |
| 68      | M      | 54  | HCC       | P     | P     | 5.3         | 2.4         | 13           | 21.04         |
| 69      | M      | 65  | HCC       | N     | P     | 1.17        | 2.32        | 5.84         | 6.5           |
| 70      | M      | 82  | HCC       | P     | P     | 5.14        | 1.45        | 45.3         | 4.78          |
| 71      | M      | 61  | HCC       | N     | N     | 3.3         | 1.9         | 20.59        | 10.23         |
| 72      | M      | 52  | HCC       | N     | P     | 14.7        | 1.6         | NA           | 6.47          |
| 73      | F      | 64  | HCC       | N     | P     | 13.8        | 1.6         | 20.75        | 6.84          |
| 74      | M      | 63  | HCC       | N     | P     | 3.9         | 3.8         | 8.89         | 15.77         |
| 75      | M      | 58  | HCC       | N     | P     | 2.2         | 6.3         | 39.18        | 2.87          |
| 76      | M      | 55  | HCC       | N     | P     | 955.1       | 2.1         | 27.42        | 71.58         |
| 77      | M      | 62  | HCC       | N     | P     | 0.8         | 1           | 12.44        | 13.2          |
| 78      | M      | 51  | HCC       | P     | P     | 11.3        | 3.7         | 14.32        | 12.86         |
| 79      | M      | 52  | HCC       | P     | P     | 70.5        | 2.9         | 11.46        | 45.32         |
| 80      | M      | 37  | HCC       | P     | P     | 3.2         | 2.4         | 58.21        | 18.08         |
| 81      | M      | 67  | HCC       | P     | P     | 1301        | 2.54        | 6.66         | 16.96         |
| 82      | M      | 68  | HCC       | P     | P     | 7.8         | 1.6         | 10.69        | 4.03          |
| 83      | M      | 47  | HCC       | P     | P     | 2.9         | 1.8         | 10.88        | 17.17         |

F, female; M, male; HCC, hepatocellular carcinoma; HBsAg, Hepatitis B Surface Antigen; HBcAb, Hepatitis B Core Antibody; P, Positive; N, Negative; NA, not available.

**Table S3 Clinical characteristics of benign patients in this study**

| Patient | Gender | Age | Diagnosis          | HBsAg | HBcAb | AFP (ng/ml) | CEA (ng/ml) | CA125 (U/ml) | CA19-9 (U/ml) |
|---------|--------|-----|--------------------|-------|-------|-------------|-------------|--------------|---------------|
| 1       | M      | 48  | Hepatic hemangioma | N     | P     | 3.4         | 3.7         | 7.84         | 1.67          |
| 2       | F      | 53  | Hepatic hemangioma | N     | P     | 2.5         | 2.1         | 14.81        | 15.57         |
| 3       | F      | 50  | Hepatic hemangioma | N     | N     | 3           | 0.5         | 15.58        | 10.15         |
| 4       | M      | 51  | Hepatic hemangioma | N     | P     | 4.3         | 2.2         | 4.74         | 6.58          |
| 5       | F      | 48  | Hepatic hemangioma | N     | N     | 0.96        | 0.81        | 16.57        | 5.8           |
| 6       | F      | 53  | Hepatic hemangioma | N     | N     | 3.3         | 2.2         | 4.03         | 4.28          |
| 7       | F      | 32  | Hepatic hemangioma | N     | N     | 1.3         | 1.3         | 12.33        | 3.55          |
| 8       | F      | 53  | Hepatic hemangioma | N     | N     | 2.7         | 0.5         | 9.22         | 5.51          |
| 9       | F      | 40  | Hepatic hemangioma | N     | N     | 1.65        | 0.49        | 9.98         | 6.19          |
| 10      | F      | 56  | Hepatic hemangioma | N     | P     | 5.4         | 2.3         | 19.29        | 29.94         |
| 11      | F      | 54  | Hepatic hemangioma | N     | N     | 1.4         | 2           | 13.56        | 25.91         |
| 12      | F      | 72  | Hepatic hemangioma | N     | P     | 2.82        | 0.85        | 11.92        | 6.99          |
| 13      | M      | 60  | Hepatic hemangioma | N     | P     | 0.97        | 3.59        | 9.73         | 205.3         |

| Patient | Gender | Age | Diagnosis          | HBsAg | HBcAb | AFP (ng/ml) | CEA (ng/ml) | CA125 (U/ml) | CA19-9 (U/ml) |
|---------|--------|-----|--------------------|-------|-------|-------------|-------------|--------------|---------------|
| 1       | M      | 67  | Intrahepatic stone | P     | P     | 2.9         | 4.2         | 10.26        | 171           |
| 2       | M      | 66  | Intrahepatic stone | N     | P     | 2.7         | 3.6         | 7.8          | 25.4          |
| 3       | F      | 51  | Intrahepatic stone | P     | P     | 1.96        | 3.59        | 9.46         | 26.77         |
| 4       | F      | 52  | Intrahepatic stone | N     | N     | 3.1         | 3.5         | 5.53         | 30.34         |
| 5       | F      | 66  | Intrahepatic stone | N     | N     | 3.7         | 2.2         | 7.6          | 17.15         |
| 6       | F      | 64  | Intrahepatic stone | N     | P     | 3.7         | 2.6         | 130.6        | 94.31         |
| 7       | F      | 48  | Intrahepatic stone | N     | P     | 1.4         | 3.2         | 27.64        | 136.8         |
| 8       | F      | 63  | Intrahepatic stone | N     | P     | 1.6         | 5.5         | 47.82        | 1000          |
| 9       | F      | 63  | Intrahepatic stone | N     | N     | 3.2         | 3.98        | 9.8          | 806           |
| 10      | F      | 64  | Intrahepatic stone | N     | P     | 7.4         | 7.4         | 267.5        | 349.2         |
| 11      | F      | 56  | Intrahepatic stone | N     | N     | 1.8         | 6           | 10.4         | 56.26         |
| 12      | F      | 60  | Intrahepatic stone | N     | N     | 2.64        | 1.06        | 33.62        | 106.7         |
| 13      | F      | 58  | Intrahepatic stone | N     | N     | 26.16       | 1.01        | 9.24         | 7.27          |
| 14      | M      | 77  | Intrahepatic stone | N     | N     | 3.3         | 4.12        | 83.85        | 295.3         |
| 15      | F      | 48  | Intrahepatic stone | N     | P     | 3.54        | 0.74        | 8.81         | 4.4           |
| 16      | F      | 50  | Intrahepatic stone | N     | N     | 4.22        | 1.1         | 13.96        | 9.18          |
| 17      | F      | 69  | Intrahepatic stone | N     | N     | 2.7         | 3.76        | 15.5         | 800.6         |
| 18      | F      | 76  | Intrahepatic stone | N     | N     | 3.86        | 3.48        | 15.14        | 22.46         |
| 19      | F      | 52  | Intrahepatic stone | N     | P     | 3.81        | 3.49        | 134.6        | 1000          |
| 20      | F      | 64  | Intrahepatic stone | N     | N     | 1.6         | 1           | 3.15         | 21.86         |

F, female; M, male; HBsAg, Hepatitis B Surface Antigen; HBcAb, Hepatitis B Core Antibody; P, Positive; N, Negative.

**Table S4 Clinical characteristics of chronic hepatitis B patients and healthy individuals in this study**

| Chronic Hepatitis B | Gender | Age | HBsAg | HBcAb | CA19-9 (U/ml) |
|---------------------|--------|-----|-------|-------|---------------|
| 1                   | M      | 55  | P     | P     | 8.4           |
| 2                   | M      | 32  | P     | P     | 18.42         |
| 3                   | M      | 35  | P     | P     | 17.69         |
| 4                   | M      | 42  | P     | P     | 32.66         |
| 5                   | M      | 46  | P     | P     | 26.95         |
| 6                   | M      | 28  | P     | P     | 17.93         |
| 7                   | M      | 29  | P     | P     | 18.27         |
| 8                   | F      | 34  | P     | P     | 15.85         |
| 9                   | F      | 51  | P     | P     | 22.09         |
| 10                  | F      | 55  | P     | P     | 22.35         |
| 11                  | M      | 27  | P     | P     | 19.46         |
| 12                  | F      | 22  | P     | P     | 29.85         |
| 13                  | F      | 38  | P     | P     | 7.2           |
| 14                  | M      | 34  | P     | P     | 2.91          |
| 15                  | F      | 38  | P     | P     | 12.95         |
| 16                  | M      | 45  | P     | P     | 9.94          |
| 17                  | M      | 42  | P     | P     | 9.85          |
| 18                  | M      | 26  | P     | P     | 10.94         |
| 19                  | M      | 31  | P     | P     | 22.84         |
| 20                  | M      | 24  | P     | P     | 6.35          |
| 21                  | M      | 48  | P     | P     | 18.95         |
| 22                  | M      | 26  | P     | P     | 13.85         |
| 23                  | F      | 29  | P     | P     | 1.4           |
| 24                  | M      | 32  | P     | P     | 15.4          |
| 25                  | M      | 46  | P     | P     | 25.35         |
| 26                  | F      | 42  | P     | P     | 18.82         |
| 27                  | F      | 48  | P     | P     | 12.91         |
| 28                  | M      | 41  | P     | P     | 25.36         |
| 29                  | F      | 27  | P     | P     | 19.98         |
| 30                  | M      | 44  | P     | P     | 13.71         |
| 31                  | M      | 41  | P     | P     | 15.17         |
| 32                  | M      | 40  | P     | P     | 27.93         |
| 33                  | M      | 29  | P     | P     | 18.56         |
| 34                  | M      | 30  | P     | P     | 19.71         |
| 35                  | F      | 37  | P     | P     | 16.17         |
| 36                  | F      | 41  | P     | P     | 15.75         |
| 37                  | F      | 25  | P     | P     | 14.84         |
| 38                  | M      | 38  | P     | P     | 26.77         |
| 39                  | F      | 32  | P     | P     | 29.43         |
| 40                  | F      | 29  | P     | P     | 28.39         |
| 41                  | M      | 27  | P     | P     | 20.08         |
| 42                  | M      | 24  | P     | P     | 28.93         |
| 43                  | M      | 46  | P     | P     | 19.21         |
| 44                  | F      | 44  | P     | P     | 14.93         |
| 45                  | M      | 36  | P     | P     | 7.5           |

  

| Healthy individuals | Gender | Age | HBsAg | HBcAb | CA19-9 (U/ml) |
|---------------------|--------|-----|-------|-------|---------------|
| 1                   | M      | 70  | N     | N     | 30.8          |
| 2                   | F      | 51  | N     | N     | 15.18         |
| 3                   | M      | 38  | N     | N     | 24.39         |
| 4                   | M      | 42  | N     | N     | 18.56         |
| 5                   | F      | 49  | N     | N     | 24.7          |
| 6                   | F      | 49  | N     | N     | 20.12         |
| 7                   | F      | 45  | N     | N     | 17.88         |
| 8                   | M      | 54  | N     | N     | 19.82         |
| 9                   | M      | 44  | N     | N     | 22.68         |
| 10                  | M      | 54  | N     | N     | 6.6           |
| 11                  | F      | 45  | N     | N     | 6.5           |
| 12                  | F      | 61  | N     | N     | 18.9          |
| 13                  | F      | 68  | N     | N     | 15.71         |
| 14                  | F      | 82  | N     | N     | 26.89         |
| 15                  | M      | 76  | N     | N     | 19.91         |
| 16                  | M      | 54  | N     | N     | 25.95         |
| 17                  | M      | 61  | N     | N     | 9.4           |
| 18                  | F      | 50  | N     | N     | 15.85         |
| 19                  | F      | 56  | N     | N     | 25.95         |
| 20                  | M      | 69  | N     | N     | 10.93         |
| 21                  | F      | 60  | N     | N     | 15.85         |
| 22                  | M      | 68  | N     | N     | 22.09         |
| 23                  | M      | 49  | N     | N     | 25.55         |
| 24                  | F      | 55  | N     | N     | 19.56         |
| 25                  | F      | 70  | N     | N     | 18.93         |
| 26                  | F      | 55  | N     | N     | 15.43         |
| 27                  | M      | 47  | N     | N     | 7.21          |
| 28                  | M      | 53  | N     | N     | 29.94         |
| 29                  | M      | 64  | N     | N     | 5.61          |
| 30                  | F      | 46  | N     | N     | 8.2           |
| 31                  | F      | 52  | N     | N     | 17.75         |
| 32                  | M      | 62  | N     | N     | 30.75         |
| 33                  | M      | 75  | N     | N     | 25.93         |
| 34                  | F      | 57  | N     | N     | 12.78         |
| 35                  | F      | 81  | N     | N     | 18.43         |
| 36                  | F      | 53  | N     | N     | 30.17         |
| 37                  | M      | 86  | N     | N     | 24.84         |
| 38                  | F      | 61  | N     | N     | 25.75         |
| 39                  | F      | 61  | N     | N     | 15.2          |
| 40                  | M      | 67  | N     | N     | 10.72         |
| 41                  | F      | 64  | N     | N     | 28.56         |
| 42                  | M      | 51  | N     | N     | 28.99         |
| 43                  | M      | 71  | N     | N     | 19.23         |
| 44                  | M      | 64  | N     | N     | 30.76         |
| 45                  | M      | 53  | N     | N     | 16.52         |

F, female; M, male; HBsAg, Hepatitis B Surface Antigen; HBcAb, Hepatitis B Core Antibody; P, Positive; N, Negative.

**Table S5 Primer of gene corresponding to each biomarker for PCR**

| Gene           | Forward                     | Reverse                  | Amplicon |
|----------------|-----------------------------|--------------------------|----------|
| PI15-1         | 5'GGCATTGTGCAGAGCAAAGTA     | 5'TATTGGTTGGCGGGGATGAG   | 160bp    |
| PI15-2         | 5'GGCATTGTGCAGAGCAAAGTA     | 5'AGGTCCATGGTCCCAAATGC   | 396bp    |
| AFP            | 5'AGGGAGCGGCTGACATTATT      | 5'GCAGCATTTCTCCAACAGGC   | 329bp    |
| CEACAM5        | 5'AATAACGGGACCTATGCCTGTTT   | 5'CCCAACCAGCACTCCAAT     | 151bp    |
| MUC16          | 5'GCCTCTACCTAACGGTTACAATGAA | 5'GGTACCCCATGGCTGTTGTG   | 114bp    |
| KLK3           | 5'GAGGAGTTCTTGACCCCAA       | 5'CAGAATCACCCGAGCAGGT    | 154bp    |
| GH1            | 5'GGCGCCTCTGACAGCAACGTCT    | 5'GCACGATGCGCAGGAATGTCTC | 232bp    |
| $\beta$ -actin | 5'TTGCCGACAGGATGCAGAA       | 5'GCCGATCCACACGGAGTACTT  | 101bp    |

PI15-1 and PI15-2 are the two primers corresponding to the gene PI15. PI15, peptidase inhibitor 15; AFP, alpha fetoprotein; CEACAM5, carcinoembryonic antigen related cell adhesion molecule 5; MUC16, mucin 16; KLK3, kallikrein related peptidase 3; GH1, growth hormone 1.
