# Supplementary figures and images for: Peptidase inhibitor 15 as a novel blood diagnostic marker for cholangiocarcinoma
Source: PubMed Central journal article supplement — eBioMedicine. 2019 Jan 9;40:422–31. doi: 10.1016/j.ebiom.2018.12.063 (PMC6414306; doi:10.1016/j.ebiom.2018.12.063), 2019-01-09

# Supplementary Figure 1

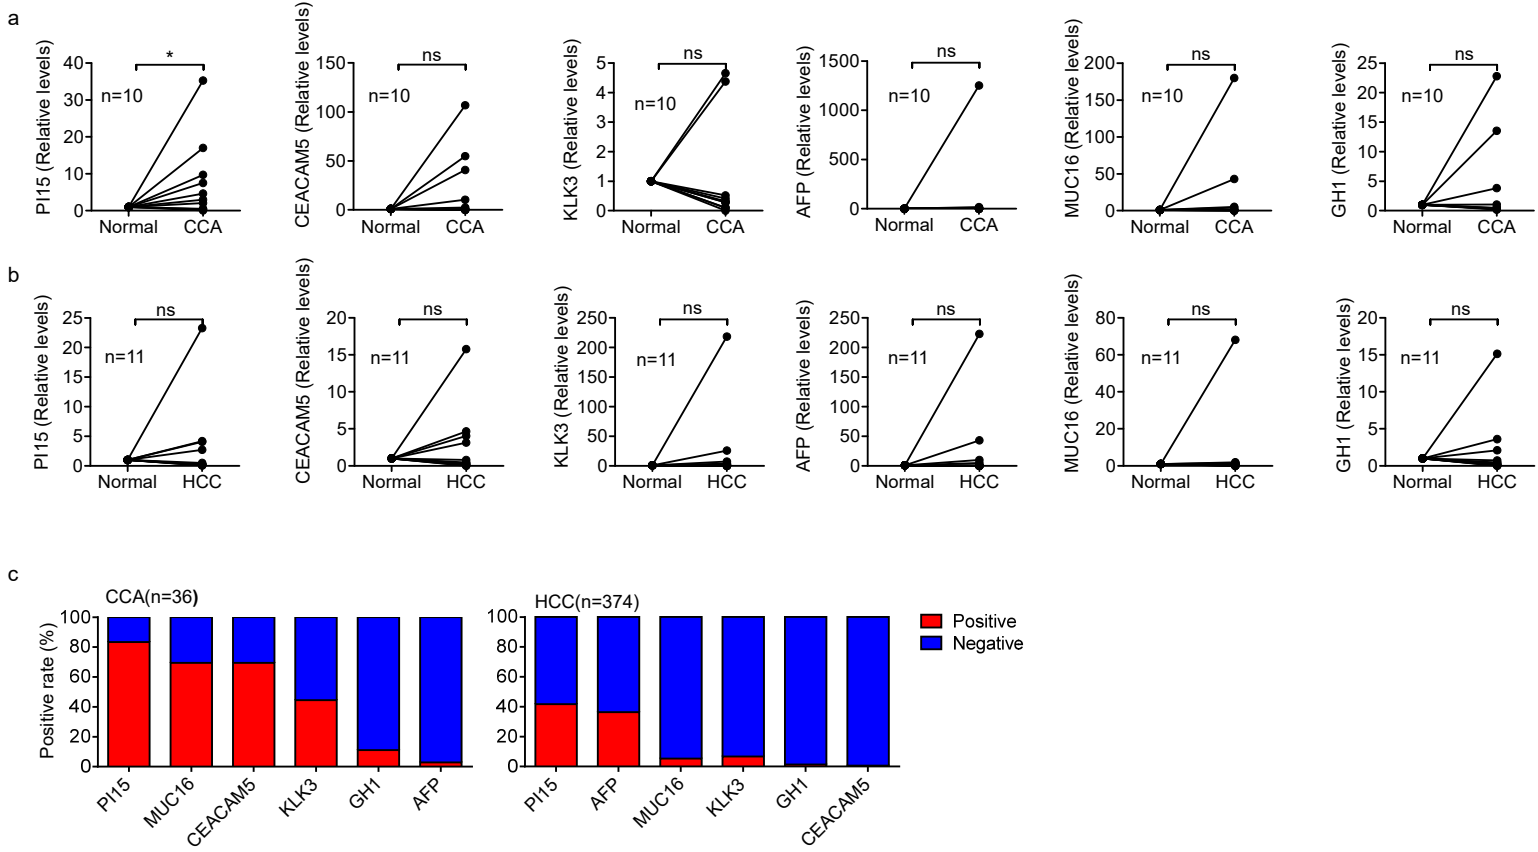

Supplement: mmc1.pdf [file mmc1.pdf]
